# Supplementary material
Source: publisher site journal article supplement (https://www.dovepress.com/get_supplementary_file.php?f=416592.docx)
Supplement: Supplementary file 1 [file get_supplementary_file.php]

Supplementary Material

**Supplementary Table S1** Primers and probes sequences of selected SNPs in *AKT1* gene

| **SNPs** | **MAF†** | ***P**** | **Primers and probes sequences (5’-3’)** |
| --- | --- | --- | --- |
| rs2494732 | 0.375 | 0.808 | Primer-1: CTTTCAGGGCTGCTCAAGAAGG |
| (T>C) |  |  | Primer-2: GGCCAAGGACATCAAGCTTTG |
|  |  |  | Probe-1: FAM-CCCAGCTACAGGCTA-MGB |
|  |  |  | Probe-2: VIC-CCAGCTGCAGGCT-MGB |
| rs2494752 | 0.244 | 0.663 | Primer-1: CACTTGCTGGCCTTGTCTCA |
| (A>G) |  |  | Primer-2: CCATGCAAGGATGGAGGAA |
|  |  |  | Probe-1: FAM-CCCTCTTACCCTCTG-MGB |
|  |  |  | Probe-2: VIC-CCCTCTCACCCTCT-MGB |
| rs1130233 | 0.425 | 0.677 | Primer-1: CCTCCCGCAGCTGTTCTT |
| (C>T) |  |  | Primer-2: CACAATCTCAGCGCCATAGAAG |
|  |  |  | Probe-1: FAM-CCGGGAACGTGTGTT-MGB |
|  |  |  | Probe-2: VIC-CCGGGAGCGTGTG-MGB |

**Notes:**

**Abbreviations:** SNPs, single nucleotide polymorphisms; MAF, minor allele frequency.

† Reference MAF from NCBI dbSNP database, based on HapMap of Han Chinese in Beijing, China (CHB) (available at http://www.ncbi.nlm.nih.gov/SNP/).

* *P*-value of Hardy-Weinberg equilibrium for SNPs among control group.

**Supplementary Table S2** Associations of three SNPs with NAFLD risk in co-dominant, dominant, recessive, and additive models of multivariable analyses

| **SNPs** | **Co-dominant model**  **(TC *vs.* TT) †** | | **Co-dominant model**  **(CC *vs.* TT) †** | | **Dominant model**  **(TC+CC *vs.* TT) †** | | **Recessive model**  **(CC *vs.* TT+TC) †** | | **Additive model**  **(CC *vs.* TC *vs.* TT) †** | |
| --- | --- | --- | --- | --- | --- | --- | --- | --- | --- | --- |
| ***P*** | ***P*FDR*** | ***P*** | ***P*FDR*** | ***P*** | ***P*FDR*** | ***P*** | ***P*FDR*** | ***P*** | ***P*FDR*** |
| rs2494732 (T>C) | **0.012** | **0.036** | 0.080 | **0.240** | **0.006** | **0.018** | 0.232 | 0.693 | **0.007** | **0.021** |
| rs2494752 (A>G) | **0.048** | **0.072** | 0.855 | 0.855 | 0.100 | **0.150** | 0.462 | 0.693 | 0.347 | 0.521 |
| rs1130233 (C>T) | 0.417 | 0.417 | 0.589 | 0.855 | 0.421 | 0.421 | 0.904 | 0.904 | 0.565 | 0.565 |

**Notes:**

**Abbreviations:** SNPs, single nucleotide polymorphisms; NAFLD, nonalcoholic fatty liver disease; FDR, false discovery rate.

Bold type indicates statistically significant results, deriving from logistic regression analyses with adjustment for sex, age, triglycerides and glucose.

† Take rs2494732 as an example.

* Adjusted *P*-value using FDR for multiple testing correction. The *P*FDR value≤0.25 was regarded as modest confidence that the correlation represented a positive result.23

**Supplementary Table S3** Stratified analysis of the association between combined favorable alleles and NAFLD risk

| **Variables** | **Controls**  ***n* (0/1-2/3-4)** | **NAFLD cases**  ***n* (0/1-2/3-4)** | **OR (95% CI) *** | ***P* *** | ***P* **** |
| --- | --- | --- | --- | --- | --- |
| Sex |  |  |  |  | 0.329 |
| male | 361/734/122 | 247/428/56 | **0.837 (0.714-0.981)** | **0.028** |  |
| female | 208/388/65 | 33/43/8 | 0.681 (0.454-1.021) | 0.063 |  |
| Age, years |  |  |  |  | **0.022** |
| <40 | 198/421/67 | 106/165/17 | **0.643 (0.492-0.841)** | **0.001** |  |
| ≥40 | 371/701/120 | 174/306/47 | 0.923 (0.772-1.103) | 0.376 |  |
| BMI, kg/m2 |  |  |  |  | 0.073 |
| <24 | 364/735/113 | 80/127/15 | **0.665 (0.509-0.869)** | **0.003** |  |
| ≥24 | 184/342/65 | 189/325/47 | 0.895 (0.737-1.087) | 0.264 |  |
| BP, mmHg |  |  |  |  | 0.953 |
| SBP<140 and DBP<90 | 437/879/126 | 177/288/37 | **0.829 (0.687-0.999)** | **0.049** |  |
| SBP≥140 or/and DBP≥90 | 111/198/52 | 91/164/25 | 0.821 (0.634-1.062) | 0.133 |  |
| GLU, mmol/L |  |  |  |  | 0.326 |
| <5.6 | 399/778/119 | 152/271/38 | 0.863 (0.712-1.048) | 0.137 |  |
| ≥5.6 | 169/344/66 | 128/198/25 | **0.742 (0.589-0.936)** | **0.012** |  |
| TG, mmol/L |  |  |  |  | 0.891 |
| <1.7 | 446/901/142 | 148/243/37 | **0.823 (0.682-0.993)** | **0.042** |  |
| ≥1.7 | 122/221/43 | 132/226/26 | 0.841 (0.661-1.070) | 0.158 |  |
| HDL-C, mmol/L |  |  |  |  | 0.586 |
| ≤1.04 | 63/142/24 | 79/140/17 | 0.757 (0.553-1.036) | 0.082 |  |
| >1.04 | 505/980/161 | 201/329/46 | **0.835 (0.704-0.991)** | **0.039** |  |
| ALT, U/L |  |  |  |  | 0.071 |
| <40 | 511/1018/165 | 189/359/52 | 0.889 (0.754-1.049) | 0.165 |  |
| ≥40 | 57/104/20 | 91/110/11 | **0.640 (0.452-0.906)** | **0.012** |  |
| AST, U/L |  |  |  |  | 0.588 |
| <40 | 547/1088/177 | 260/442/61 | **0.831 (0.714-0.968)** | **0.017** |  |
| ≥40 | 21/34/8 | 20/27/2 | 0.692 (0.359-1.333) | 0.271 |  |
| γ-GT, U/L |  |  |  |  | 0.980 |
| <50 | 502/1017/162 | 205/364/49 | **0.827 (0.699-0.979)** | **0.027** |  |
| ≥50 | 66/105/23 | 75/105/14 | 0.823 (0.591-1.145) | 0.247 |  |

**Notes:**

**Abbreviations:** NAFLD, nonalcoholic fatty liver disease; BMI, body mass index; SBP, systolic blood pressure; DBP, diastolic blood pressure; GLU, glucose; TG, triglycerides; HDL-C, high density lipoprotein-cholesterol; ALT, alanine aminotransferase; AST, aspartate aminotransferase; γ-GT, γ-glutamyl transpeptidase.

Combined favorable alleles: *ATK1* rs2494732-C and rs2494752-G.

* Logistic regression model, adjusted for sex, age, TG, and GLU. (Exclusion of stratification factors)

** *P*-value of the heterogeneity test.

Bold type indicates statistically significant results.

**Supplementary Table S4** Multi-collinearity test for potential independent influencing variables of NAFLD

| **Variables** | **Standardized Coefficients** | ***t*** | ***P*** | **Collinearity Statistics** | |
| --- | --- | --- | --- | --- | --- |
| ***β*** | **Tolerance‡** | **VIF‡** |
| Sex (male† *vs.* female) | -0.103 | -5.364 | <0.001 | 0.846 | 1.183 |
| Age (<40† *vs.* ≥40 years) | -0.025 | -1.403 | 0.161 | 0.947 | 1.056 |
| BMI (<24† *vs.* ≥24 kg/m2) | 0.239 | 12.292 | <0.001 | 0.820 | 1.219 |
| Hypertension (no† *vs.* yes) | 0.071 | 3.852 | <0.001 | 0.909 | 1.100 |
| Hyperglycemia (no† *vs.* yes) | 0.041 | 2.260 | 0.024 | 0.943 | 1.061 |
| Hypertriglyceridemia (no† *vs.* yes) | 0.125 | 6.212 | <0.001 | 0.762 | 1.312 |
| Low HDL-C (no† *vs.* yes) | 0.065 | 3.380 | 0.001 | 0.835 | 1.198 |
| ALT (<40† *vs.* ≥40 U/L) | 0.107 | 4.920 | <0.001 | 0.661 | 1.512 |
| AST (<40† *vs.* ≥ 40U/L) | -0.042 | -2.123 | 0.034 | 0.779 | 1.283 |
| γ-GT (<50† *vs.* ≥50 U/L) | 0.023 | 1.141 | 0.254 | 0.783 | 1.277 |
| Favorable alleles (0 *vs.* 1-2 vs. 3-4) | -0.039 | -2.228 | 0.026 | 0.994 | 1.006 |
| Constant |  | 8.000 | <0.001 |  |  |

**Notes:**

**Abbreviations:** NAFLD, nonalcoholic fatty liver disease; VIF, variance inflation factor; BMI, body mass index; HDL-C, high density lipoprotein-cholesterol; ALT, alanine aminotransferase; AST, aspartate aminotransferase; γ-GT, γ-glutamyl transpeptidase.

† Reference in analyses of categorical variables.

‡ Tolerance<0.1 or VIF>10 indicates the presence of collinearity.

**
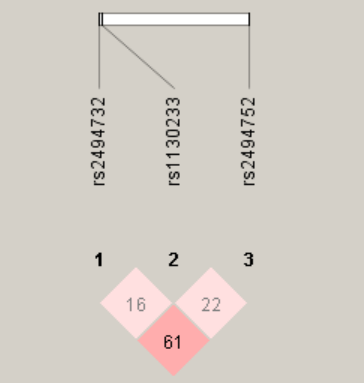
**

**Supplementary Figure S1** Linkage disequilibrium (LD) information of rs2494732, rs1130233, and rs2494752 in *AKT1* gene. Each square plots the level of LD (r2 values) between a pair of SNPs. The color shading of the cell indicated strength of r2 as shown by the numeral.
